# Supplementary material for: Microsolvation of H2O+, H3O+, and CH3OH2+ by He in a cryogenic ion trap: structure of solvation shells
Source: Royal Society of Chemistry journal article supplement (doi:10.1039/d2cp01192a), 2022-01-01
Supplement: d2cp01192a1.pdf [file d2cp01192a1.pdf]

## Electronic Supporting Information

**Microsolvation of  $\text{H}_2\text{O}^+$ ,  $\text{H}_3\text{O}^+$ , and  $\text{CH}_3\text{OH}_2^+$  by He in a cryogenic ion trap:**

**Structure of solvation shells**

David Müller and Otto Dopfer\*

Institut für Optik und Atomare Physik, Technische Universität Berlin, Hardenbergstr. 36, 10623 Berlin, Germany

\* Corresponding author: dopfer@physik.tu-berlin.de

**Table S1.** NBO charge distribution on the He atoms in  $X^+He_n$  clusters evaluated at the CCSD(T)/aug-cc-pVTZ level (in  $e$ ).

| n              | H <sub>2</sub> O <sup>+</sup> | H <sub>3</sub> O <sup>+</sup> | CH <sub>3</sub> OH <sub>2</sub> <sup>+</sup> |
|----------------|-------------------------------|-------------------------------|----------------------------------------------|
| 0 <sup>a</sup> | 0.54504                       | 0.58759                       | 0.56127                                      |
| 1 (H)          | 0.00913                       | 0.00524                       | 0.00278                                      |
| 1 (p)          | 0.00120                       |                               |                                              |
| 2 (2H)         | 0.00866                       | 0.00494                       | 0.00273                                      |
|                | 0.00866                       | 0.00494                       | 0.00273                                      |
| 2 (2p)         | 0.00120                       |                               |                                              |
|                | 0.00120                       |                               |                                              |
| 3              | 0.00843                       | 0.00478                       |                                              |
|                | 0.00843                       | 0.00478                       |                                              |
|                | 0.00098                       | 0.00478                       |                                              |
| 4              | 0.00821                       | 0.00460                       |                                              |
|                | 0.00821                       | 0.00452                       |                                              |
|                | 0.00097                       | 0.00472                       |                                              |
|                | 0.00097                       | 0.00037                       |                                              |
| 5              | 0.00795                       | 0.00439                       |                                              |
|                | 0.00795                       | 0.00437                       |                                              |
|                | 0.00104                       | 0.00443                       |                                              |
|                | 0.00104                       | 0.00037                       |                                              |
|                | 0.00027                       | 0.00037                       |                                              |
| 6              |                               | 0.00432                       |                                              |
|                |                               | 0.00432                       |                                              |
|                |                               | 0.00432                       |                                              |
|                |                               | 0.00034                       |                                              |
|                |                               | 0.00034                       |                                              |
|                |                               | 0.00034                       |                                              |

<sup>a</sup> Partial charge on the equivalent OH protons.

**Table S2.** Scaled vibrational OH stretch and bend frequencies of  $\text{H}_2\text{O}^+\text{He}_n$  calculated at the CCSD/aug-cc-pVTZ level (in  $\text{cm}^{-1}$ ).<sup>a</sup>

| $n$    | $\nu_1$                                   | $\nu_3$                                   | $\nu_2$                       |
|--------|-------------------------------------------|-------------------------------------------|-------------------------------|
| 0      | 3210.7 (115)<br><i>3212.86</i>            | 3261.0 (447)<br><i>3259.04</i>            | 1408.5 (166)<br><i>1408.4</i> |
| 1 (H)  | 3184.8 (308)<br><i>3198.0<sup>b</sup></i> | 3253.0 (412)<br><i>3253.9<sup>b</sup></i> | 1412.1 (152)                  |
| 1 (p)  | 3214.9 (112)                              | 3265.3 (437)                              | 1411.2 (162)                  |
| 2 (2H) | 3189.7 (177)                              | 3220.3 (701)                              | 1415.4 (139)                  |
| 2 (2p) | 3219.2 (108)                              | 3269.5 (426)                              | 1413.7 (158)                  |
| 3      | 3194.8 (172)                              | 3225.3 (682)                              | 1418.3 (137)                  |
| 4      | 3200.0 (167)                              | 3230.2 (663)                              | 1420.8 (134)                  |
| 5      | 3204.5 (162)                              | 3233.5 (644)                              | 1417.7 (146)                  |

<sup>a</sup> IR intensities in  $\text{km/mol}$  are listed in parentheses. Scaling factor of 0.9442 and 0.9492 for  $\nu_{1/3}$  and  $\nu_2$ . Experimental values are listed in italics. <sup>b</sup> B tunnelling component of  $K_a = 0-0$  subband.

**Table S3.** Scaled vibrational OH stretch frequencies of  $\text{H}_3\text{O}^+\text{He}_n$  calculated at the CCSD/aug-cc-pVTZ level (in  $\text{cm}^{-1}$ ).<sup>a</sup>

| $n$ | $\nu_1$                    | $\nu_3(1)$                  | $\nu_3(2)$                  |
|-----|----------------------------|-----------------------------|-----------------------------|
| 0   | 3438.7 (32)<br><i>3440</i> | 3529.1 (459)<br><i>3528</i> | 3529.1 (459)<br><i>3528</i> |
| 1   | 3433.7 (75)                | 3512.2 (548)                | 3535.1 (451)                |
| 2   | 3433.0 (63)                | 3504.2 (644)                | 3530.7 (484)                |
| 3   | 3434.3 (43)                | 3511.4 (630)                | 3511.5 (630)                |
| 4   | 3437.1 (42)                | 3513.9 (615)                | 3514.6 (624)                |
| 5   | 3439.7 (41)                | 3516.4 (607)                | 3517.6 (610)                |
| 6   | 3436.2 (40)                | 3512.6 (601)                | 3512.6 (601)                |

<sup>a</sup> IR intensities in  $\text{km/mol}$  are listed in parentheses. Scaling factor of 0.9505. Experimental values (averaged tunnelling components) are listed in italics. The  $\nu_3$  mode has two components, which are degenerate for  $n=3$  and 6.

**Table S4.** Scaled vibrational OH stretch frequencies of  $\text{CH}_3\text{OH}_2^+\text{He}_n$  calculated at the CCSD/aug-cc-pVTZ level (in  $\text{cm}^{-1}$ ).<sup>a</sup>

| $n$ | $\nu_{\text{OH}}^{\text{s}}$ | $\nu_{\text{OH}}^{\text{a}}$ |
|-----|------------------------------|------------------------------|
| 0   | 3510.0 (198)                 | 3584.9 (320)                 |
| 1   | 3508.3 (236)<br><i>3504</i>  | 3581.2 (370)<br><i>3571</i>  |
| 2   | 3508.4 (252)                 | 3577.1 (439)                 |

<sup>a</sup> IR intensities in  $\text{km/mol}$  are listed in parentheses. Scaling factor of 0.9505. Experimental values are listed in italics.
